# Supplementary material
Source: Springer Nature journal article supplement (https://www.springermedizin.de/resource/supplementary/12958_2010_771_MOESM7_ESM.pdf/9568460)

Normal Endometrium

---

Primary tumor (T4)

Proliferative

Secretory

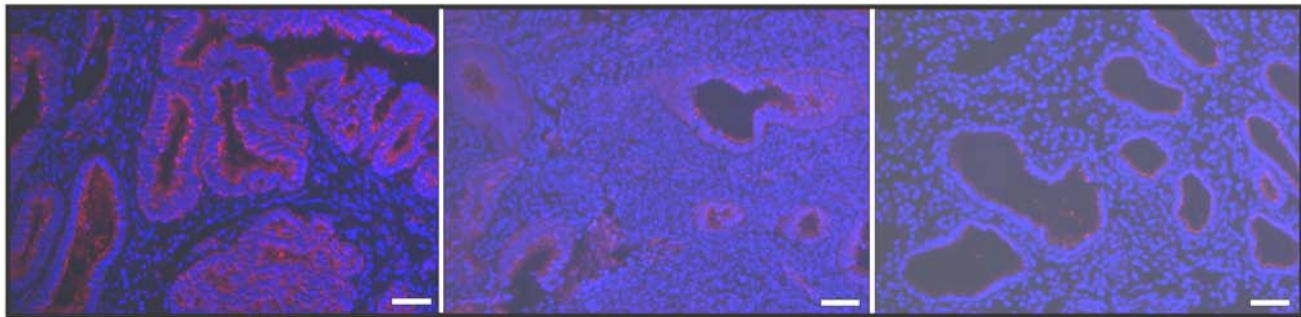

Supplement: MOESM7 [file 9568460]
